# Supplementary material for: Regional variation in coronary angiography rates: the association with supply factors and the role of indication: a spatial analysis
Source: Springer Nature journal article supplement (doi:10.1186/s12872-022-02513-z), 2022-02-26
Supplement: MOESM1 [file 20173184]

# Appendix: Additional data and sensitivity analysis

## Main analysis

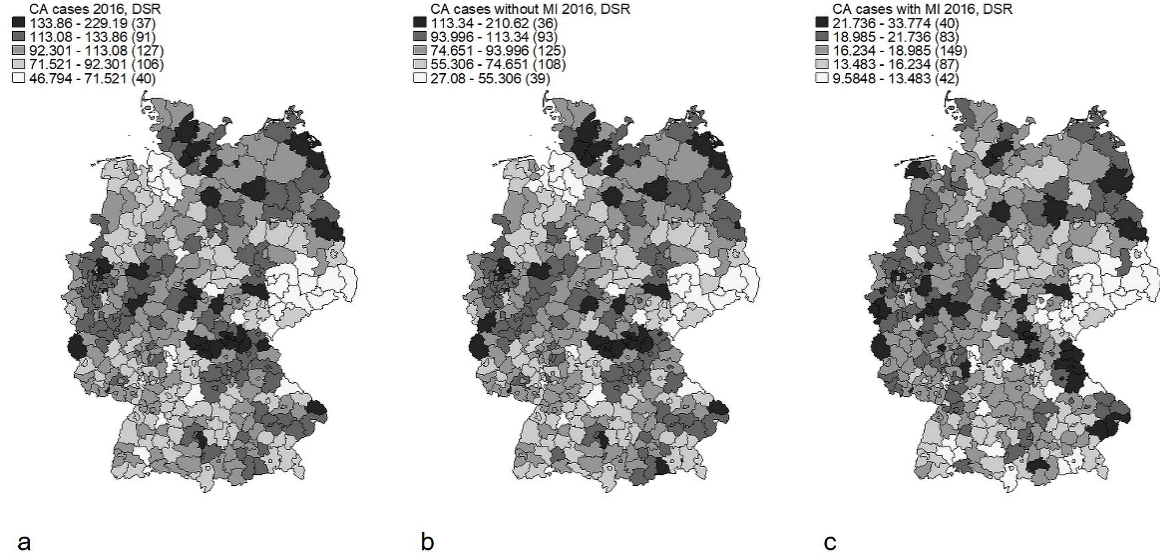

Figure A1 - Map of CA rate for (a) cases overall and (b) cases without MI (c) cases with MI, 2016; DSR, classification method: standard deviations; source: own depiction.

Table A1 – Model results of main analysis

|                                         | Cases overall           |                         |                      |                         | Cases without MI       |                         |                         |                        | Cases with MI       |                     |                     |                     |
|-----------------------------------------|-------------------------|-------------------------|----------------------|-------------------------|------------------------|-------------------------|-------------------------|------------------------|---------------------|---------------------|---------------------|---------------------|
|                                         | Model A (SARE)          |                         | Model B (SCRARE)     |                         | Model A (SARE)         |                         | Model B (SCRARE)        |                        | Model A (SARE)      |                     | Model B (SCRARE)    |                     |
|                                         | <i>Wr</i>               | <i>We</i>               | <i>Wr</i>            | <i>We</i>               | <i>Wr</i>              | <i>We</i>               | <i>Wr</i>               | <i>We</i>              | <i>Wr</i>           | <i>We</i>           | <i>Wr</i>           | <i>We</i>           |
| Observations                            | 401                     | 401                     | 401                  | 401                     | 401                    | 401                     | 401                     | 401                    | 401                 | 401                 | 401                 | 401                 |
| Pseudo R-squared                        | 0.4186                  | 0.4265                  | 0.4261               | 0.4352                  | 0.3813                 | 0.3894                  | 0.3895                  | 0.3992                 | 0.3986              | 0.4005              | 0.3995              | 0.4023              |
| <b>β (SE)</b>                           |                         |                         |                      |                         |                        |                         |                         |                        |                     |                     |                     |                     |
| Male under 40                           | 185.89<br>(317.7)       | 226.79<br>(279.39)      | 221.69<br>(316.85)   | 220.09<br>(334.27)      | 110.03<br>(291.4)      | 176.18<br>(309.3)       | 141.32<br>(290.65)      | 170.21<br>(308.38)     | 41.98<br>(54.61)    | 32.46<br>(55.31)    | 43.86<br>(54.6)     | 31.17<br>(55.25)    |
| Male 40 to 49                           | 384.64<br>(690.36)      | 357.4<br>(685.16)       | 428.28<br>(687.63)   | 360.14<br>(715.09)      | 437.53<br>(634.6)      | 459.59<br>(662.78)      | 477.15<br>(632.15)      | 465.56<br>(660.73)     | -118.57<br>(114.21) | -138.18<br>(114.61) | -118.46<br>(114.11) | -142.07<br>(114.49) |
| Male 50 to 59                           | -2024.69<br>(710.65)*** | -2166.58<br>(742.87)*** | -2109<br>(708.86)*** | -2248.76<br>(731.19)*** | -1933.22<br>(652.6)*** | -2055.72<br>(675.33)*** | -2009.34<br>(650.92)*** | -2128.02<br>(674.8)*** | -130.58<br>(119.5)  | -139.88<br>(119.52) | -138.6<br>(119.76)  | -153.38<br>(120.02) |
| Male 60 to 69                           | 952.6<br>(841.23)       | 551.33<br>(1038.59)     | 1075.47<br>(839.54)  | 544.02<br>(875.41)      | 994.06<br>(773.41)     | 581.16<br>(811.5)       | 1108.82<br>(771.96)     | 578.01<br>(808.97)     | 3.08<br>(139.39)    | 4.93<br>(140.45)    | 9.17<br>(139.44)    | 1.47<br>(140.27)    |
| Male 70 to 79                           | 513.74<br>(864.64)      | 891.39<br>(1016.96)     | 385.25<br>(863.85)   | 755.05<br>(908.01)      | 149.08<br>(793.38)     | 565.48<br>(836.9)       | 37.41<br>(792.41)       | 443 (837.85)           | 243.73<br>(147.06)* | 221.42<br>(148.35)  | 227.82<br>(148.1)   | 203.32<br>(149.08)  |
| Male over 80                            | 1727.12<br>(1226.06)    | 977.62<br>(1467.55)     | 1669.67<br>(1221.47) | 1015.3<br>(1271.89)     | 1712.37<br>(1128.13)   | 1017.49<br>(1179.81)    | 1650.37<br>(1124.12)    | 1047.23<br>(1176.21)   | 66.65<br>(200.58)   | 27.56<br>(201.23)   | 74.85<br>(200.64)   | 40.26<br>(201.27)   |
| Female 40 to 49                         | 1345.16<br>(722.03)*    | 1329.83<br>(725.55)*    | 1389.8<br>(719.72)*  | 1311.1<br>(734.46)*     | 1121.11<br>(664.01)*   | 1100.2<br>(680.55)      | 1158.13<br>(661.88)*    | 1082.42<br>(678.53)    | 219.64<br>(119.03)* | 224.08<br>(118.6)*  | 224.68<br>(119.08)* | 222.01<br>(118.44)* |
| Female 50 to 59                         | 1686.59<br>(851.19)**   | 2234.07<br>(931.69)**   | 1748.7<br>(847.81)** | 2271.09<br>(855.93)**   | 1489.62<br>(780.36)*   | 2011.31<br>(825.2)**    | 1545.36<br>(777.26)**   | 2043.58<br>(822.95)**  | 224.61<br>(146.95)  | 240.62<br>(148.36)  | 229.38<br>(146.92)  | 246.76<br>(148.26)* |
| Female 60 to 69                         | -1006.93<br>(810.09)    | -832 (947.13)           | -1019.72<br>(806.48) | -836.8<br>(839.34)      | -1103.98<br>(744.53)   | -882.22<br>(777.6)      | -1121.51<br>(741.22)    | -891.23<br>(775.22)    | 28.18<br>(134.8)    | 9.91<br>(135.6)     | 31.43<br>(134.73)   | 14.41<br>(135.46)   |
| Female 70 to 79                         | -368.72<br>(802.25)     | -849.58<br>(941.33)     | -248.38<br>(799.99)  | -770.02<br>(855.93)     | -102.24<br>(734.77)    | -593.27<br>(789.97)     | 7.44 (732.69)           | -519.64<br>(788.98)    | -189.04<br>(141.39) | -181.01<br>(143.88) | -180.33<br>(141.6)  | -173.18<br>(143.87) |
| Female over 80                          | -99.59<br>(697.38)      | 648.99<br>(825.48)      | -38.35<br>(695.64)   | 691.95<br>(729.09)      | -288.55<br>(641.09)    | 466.04<br>(675.73)      | -235.08<br>(639.62)     | 507.65<br>(674.12)     | 23.2<br>(114.66)    | 29.87<br>(115.37)   | 24.01<br>(114.57)   | 28.88<br>(115.19)   |
| Estimate of CHD prevalence <sup>a</sup> | 10.01<br>(0.88)***      | 10.48<br>(1.63)***      | 9.87<br>(0.88)***    | 10.38<br>(0.88)***      | 8.99<br>(0.81)***      | 9.44<br>(0.81)***       | 8.87<br>(0.81)***       | 9.35<br>(0.81)***      | 1<br>(0.14)***      | 1.01<br>(0.14)***   | 0.99<br>(0.14)***   | 1<br>(0.14)***      |
| GISD 2012                               | 0.16 (0.1)              | 0.1 (0.11)              | 0.15 (0.1)           | 0.11 (0.1)              | 0.13 (0.09)            | 0.07 (0.09)             | 0.12 (0.09)             | 0.08 (0.09)            | 0.04<br>(0.02)**    | 0.04<br>(0.02)**    | 0.04<br>(0.02)**    | 0.04<br>(0.02)***   |
| Cath labs <sup>b</sup>                  | 40.62<br>(16.33)**      | 45.92<br>(19.83)**      | 53.41<br>(18.16)***  | 56.68<br>(18.32)***     | 37.64<br>(14.96)**     | 43.36<br>(15.77)***     | 49.34<br>(16.79)***     | 53.53<br>(16.95)***    | 2.91 (2.87)         | 2.97 (2.91)         | 3.35 (2.92)         | 3.49 (2.95)         |
| W × Cath labs <sup>b</sup>              |                         |                         | 77.18<br>(47.71)     | 80.41 (49.84)           |                        |                         | 68.44 (44.18)           | 74.64 (46.56)          |                     |                     | 6.35 (7.3)          | 7.59 (7.14)         |
| Constant                                | -143.81<br>(165.58)     | -174.98<br>(142.44)     | -167.02<br>(165.36)  | -170.68<br>(173.94)     | -103.5<br>(151.88)     | -147.53<br>(160.93)     | -123.82<br>(151.71)     | -143.93<br>(160.46)    | -20.05<br>(28.46)   | -15.35<br>(28.81)   | -21.27<br>(28.46)   | -14.21<br>(28.78)   |
| ρ                                       | 0.67<br>(0.05)***       | 0.72<br>(0.06)***       | 0.66<br>(0.05)***    | 0.71<br>(0.06)***       | 0.68<br>(0.05)***      | 0.72<br>(0.06)***       | 0.68<br>(0.05)***       | 0.72<br>(0.06)***      | 0.3<br>(0.06)***    | 0.31<br>(0.09)***   | 0.3<br>(0.06)***    | 0.31<br>(0.09)***   |

\*\*\*p<0.01, \*\*p<0.05, \*p<0.1.  
a: proportion of individuals in the total sample of insured with a confirmed diagnosis of CHD during the year 2016  
b: per 10,000 population  
β: regression coefficient, GISD: German Index of Social Deprivation, MI: myocardial infarction, ρ: spatial autocorrelation parameter, SE: standard error

## Sensitivity Analysis

Table A2 - Frequency and characteristics of cardiac catheterization by treatment setting

|                                                                                                                                                                                                                            | Total            | Hospital           |                     | Office-based practice |
|----------------------------------------------------------------------------------------------------------------------------------------------------------------------------------------------------------------------------|------------------|--------------------|---------------------|-----------------------|
|                                                                                                                                                                                                                            |                  | Inpatient hospital | Outpatient hospital |                       |
| <b>Cases</b>                                                                                                                                                                                                               | n (column %)     | N (row %)          |                     |                       |
| CA                                                                                                                                                                                                                         | 425,163          | 369,882 (87.00%)   | 19,317 (4.54%)      | 35,964 (8.46%)        |
| <b>Treatment diagnosis*</b>                                                                                                                                                                                                |                  |                    |                     |                       |
| Cases with ACS                                                                                                                                                                                                             | 111,892 (26,31%) | 109,884 (98.21%)   | 67 (0.60%)          | 1,338 (1.20%)         |
| Cases without ACS                                                                                                                                                                                                          | 313,271 (73,68%) | 259,998 (82.99 %)  | 18,647 (5.95%)      | 34,626 (11.05%)       |
| Cases with stable CHD or CP                                                                                                                                                                                                | 167,696 (39,44%) | 125,107 (74.60 %)  | 15,735 (9.38%)      | 26,854 (16.01%)       |
| *inpatient main hospital diagnosis, outpatient hospital diagnosis, confirmed ambulatory diagnosis in treatment case<br>ACS: acute coronary syndrome, CA: coronary angiography, CHD: coronary heart disease, CP: chest pain |                  |                    |                     |                       |

Table A3 - Crude rate, direct standardized rate (DSR) and measures of variation

|                                                                                                                                                                                                                                   | Cases without ACS | Cases with ACS | Cases with stable CHD or CP |
|-----------------------------------------------------------------------------------------------------------------------------------------------------------------------------------------------------------------------------------|-------------------|----------------|-----------------------------|
| <b>Crude data</b>                                                                                                                                                                                                                 |                   |                |                             |
| Number of CA                                                                                                                                                                                                                      | 313,271           | 111,892        | 167,696                     |
| Crude rate per 10,000 population                                                                                                                                                                                                  | 75.05             | 26.81          | 40.18                       |
| <b>Age-gender DSR in 401 districts per 10,000 population</b>                                                                                                                                                                      |                   |                |                             |
| Median                                                                                                                                                                                                                            | 74.15             | 25.78          | 39.65                       |
| Mean (SD)                                                                                                                                                                                                                         | 75.45 (22.41)     | 26.46 (6.44)   | 40.13 (13.28)               |
| Min                                                                                                                                                                                                                               | 24.18             | 12.03          | 9.70                        |
| Max                                                                                                                                                                                                                               | 198.53            | 56.11          | 98.00                       |
| <b>Measures of variation</b>                                                                                                                                                                                                      |                   |                |                             |
| COV                                                                                                                                                                                                                               | 29.70             | 24.33          | 33.08                       |
| SCV                                                                                                                                                                                                                               | 8.85              | 5.64           | 10.64                       |
| ACS: acute coronary syndrome, CA: coronary angiography, CHD: coronary heart disease, COV: coefficient of variation, CP: chest pain, DSR: direct standardized rate, SCV: systematic component of variation, SD: standard deviation |                   |                |                             |

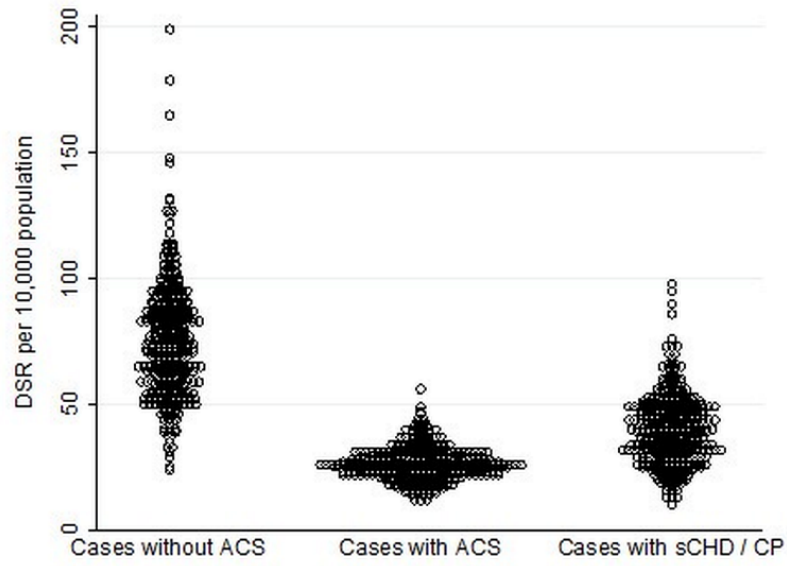

Figure A2 - Direct standardized CA rate per 10,000 population by treatment diagnosis, 2016.  
Each dot represents one of the 401 districts.

Appendix Table A4 – Model results of sensitivity analysis

|                                         | Cases without ACS      |                       |                         |                         | Cases with ACS        |                       |                       |                       | Cases with sCHD or CP |                        |                       |                       |
|-----------------------------------------|------------------------|-----------------------|-------------------------|-------------------------|-----------------------|-----------------------|-----------------------|-----------------------|-----------------------|------------------------|-----------------------|-----------------------|
|                                         | Model A (SARE)         |                       | Model B (SCRARE)        |                         | Model A (SARE)        |                       | Model B (SCRARE)      |                       | Model A (SARE)        |                        | Model B (SCRARE)      |                       |
|                                         | <i>Wr</i>              | <i>We</i>             | <i>Wr</i>               | <i>We</i>               | <i>Wr</i>             | <i>We</i>             | <i>Wr</i>             | <i>We</i>             | <i>Wr</i>             | <i>We</i>              | <i>Wr</i>             | <i>We</i>             |
| Observations                            | 401                    | 401                   | 401                     | 401                     | 401                   | 401                   | 401                   | 401                   | 401                   | 401                    | 401                   | 401                   |
| Pseudo R-squared                        | 0.3657                 | 0.3727                | 0.3763                  | 0.3845                  | 0.3675                | 0.3702                | 0.3678                | 0.3708                | 0.2464                | 0.2464                 | 0.2505                | 0.2612                |
| <b>β (SE)</b>                           |                        |                       |                         |                         |                       |                       |                       |                       |                       |                        |                       |                       |
| Male under 40                           | 63.19<br>(272.65)      | 139.54<br>(290.3)     | 96.84<br>(271.77)       | 133.36<br>(289.17)      | 91.71<br>(93.84)      | 79.76 (95.6)          | 92.83<br>(93.91)      | 78.88<br>(95.59)      | 193.78<br>(168.08)    | 239.41<br>(178.52)     | 212.24<br>(167.81)    | 234.75<br>(177.45)    |
| Male 40 to 49                           | 443.38<br>(594.76)     | 495.68<br>(622.49)    | 483.44<br>(592.05)      | 504.99<br>(620.08)      | -175.12<br>(197.14)   | -210.81<br>(198.64)   | -174.75<br>(197.13)   | -213.96<br>(198.63)   | 155.21<br>(365.51)    | 228.71<br>(381.6)      | 173.38<br>(364.38)    | 231.37<br>(379.36)    |
| Male 50 to 59                           | -1511.95<br>(611.14)** | -1691.86<br>(634)***  | -1587.57<br>(609.09)*** | -1766.01<br>(632.88)*** | -453.16<br>(205.86)** | -439.55<br>(206.72)** | -457.72<br>(206.45)** | -449.27<br>(207.77)** | -860.57<br>(376.13)** | -960.83<br>(389.44)**  | -900.57<br>(375.53)** | -1021.7<br>(388.1)*** |
| Male 60 to 69                           | 618.55<br>(724.96)     | 283.89<br>(762.22)    | 732.93<br>(723.11)      | 286.08<br>(759.25)      | 216.88<br>(240.43)    | 157.05<br>(243.32)    | 220.76<br>(240.74)    | 153.76<br>(243.28)    | 98.96<br>(445.42)     | -112.78<br>(467.12)    | 155.86<br>(444.9)     | -115.09<br>(464.38)   |
| Male 70 to 79                           | 176.09<br>(742.52)     | 559.58<br>(785.61)    | 62.38<br>(740.89)       | 434.24<br>(785.72)      | 266.21<br>(253.05)    | 280.09<br>(256.59)    | 257.45<br>(254.96)    | 266.66<br>(258.13)    | 192.23<br>(457.51)    | 471.04<br>(482.76)     | 127.09<br>(457.53)    | 373.08<br>(481.98)    |
| Male over 80                            | 1568.07<br>(1058.14)   | 859.85<br>(1108.54)   | 1500.74<br>(1053.72)    | 884.51<br>(1104.34)     | 283.65<br>(346.52)    | 229.45<br>(348.99)    | 287.53<br>(346.8)     | 238.99<br>(349.37)    | 1093.08<br>(649.36)*  | 811.32<br>(678.3)      | 1062.11<br>(647.42)   | 834.74<br>(674.49)    |
| Female 40 to 49                         | 849.2<br>(622.56)      | 829.17<br>(639.14)    | 888.32<br>(620.07)      | 809.2<br>(636.74)       | 498.01<br>(205.46)**  | 507.68<br>(205.35)**  | 500.75<br>(205.71)**  | 506.41<br>(205.3)**   | 755.97<br>(382.34)**  | 662.18<br>(391.92)*    | 781.57<br>(381.41)**  | 647.8<br>(389.66)*    |
| Female 50 to 59                         | 1167.86<br>(729.84)    | 1717.64<br>(774.38)** | 1227.97<br>(726.41)*    | 1749.62<br>(771.52)**   | 522.09<br>(252.46)**  | 539.12<br>(256.34)**  | 524.83<br>(252.64)**  | 543.84<br>(256.45)**  | 895.89<br>(450.26)**  | 1239.65<br>(476.55)*** | 927.9<br>(448.97)**   | 1265.8<br>(473.8)***  |
| Female 60 to 69                         | -636.89<br>(697.7)     | -491.73<br>(730.2)    | -651.84<br>(694.07)     | -505.5<br>(727.37)      | -291.95<br>(232.46)   | -256.19<br>(234.85)   | -290.56<br>(232.52)   | -252.38<br>(234.86)   | 44.97<br>(428.88)     | 38.8 (448.01)          | 43.92<br>(427.33)     | 35.31<br>(445.35)     |
| Female 70 to 79                         | -113.45<br>(686.7)     | -541.33<br>(741.15)   | -2.07 (684.27)          | -463.41<br>(739.5)      | -269.16<br>(242.27)   | -310.4<br>(248.29)    | -264.06<br>(242.86)   | -304.84<br>(248.57)   | -216.9<br>(424.23)    | -455.83<br>(456.58)    | -159.66<br>(423.55)   | -397.68<br>(454.55)   |
| Female over 80                          | -343.78<br>(600.84)    | 417.81<br>(634.82)    | -284.99<br>(599.09)     | 462.87<br>(632.86)      | 73.33<br>(198.1)      | 93.3<br>(200.16)      | 74.06<br>(198.11)     | 92.78<br>(200.06)     | -147.18<br>(369.24)   | 193.36<br>(388.67)     | -113.96<br>(368.64)   | 225.32<br>(386.67)    |
| Estimate of CHD prevalence <sup>a</sup> | 7.82<br>(0.76)***      | 8.26<br>(0.76)***     | 7.7 (0.76)***           | 8.16<br>(0.76)***       | 2.13<br>(0.24)***     | 2.16<br>(0.24)***     | 2.12<br>(0.24)***     | 2.15<br>(0.24)***     | 3.94<br>(0.46)***     | 4.07<br>(0.47)***      | 3.88<br>(0.47)***     | 4 (0.46)***           |
| GISD 2012                               | 0.08 (0.09)            | 0.03 (0.09)           | 0.07 (0.09)             | 0.04 (0.09)             | 0.08<br>(0.03)***     | 0.08<br>(0.03)***     | 0.08<br>(0.03)***     | 0.08<br>(0.03)***     | 0.06 (0.05)           | 0.06 (0.05)            | 0.06 (0.05)           | 0.07 (0.05)           |
| Cath labs <sup>b</sup>                  | 37.72<br>(13.99)***    | 43.42<br>(14.79)***   | 50.44<br>(15.8)***      | 54.07<br>(15.93)***     | 2.67 (4.93)           | 3.04 (5.01)           | 2.95 (5.03)           | 3.47 (5.1)            | 15.43<br>(8.64)*      | 19.08<br>(9.12)**      | 21.93<br>(9.64)**     | 26.6<br>(9.71)***     |
| W × Cath labs <sup>b</sup>              |                        |                       | 72.23<br>(41.62)*       | 77.58<br>(43.97)*       |                       |                       | 3.56 (12.69)          | 5.75 (12.45)          |                       |                        | 38.53<br>(25.33)      | 56.98<br>(26.32)**    |
| Constant                                | -83.54<br>(142.11)     | -131.65<br>(151.04)   | -105.32<br>(141.86)     | -128.09<br>(150.45)     | -41.26<br>(48.9)      | -36.15<br>(49.78)     | -41.99<br>(48.96)     | -35.35<br>(49.8)      | -124.5<br>(87.6)      | -148.23<br>(92.89)     | -136.39<br>(87.59)    | -145.17<br>(92.34)    |
| ρ                                       | 0.68<br>(0.05)***      | 0.72<br>(0.05)***     | 0.68<br>(0.05)***       | 0.71 (0)***             | 0.34<br>(0.07)***     | 0.36<br>(0.1)***      | 0.34<br>(0.07)***     | 0.36<br>(0.1)***      | 0.63<br>(0.05)***     | 0.68<br>(0.06)***      | 0.63<br>(0.05)***     | 0.67<br>(0.06)***     |

\*\*\*p<0.01, \*\*p<0.05, \*p<0.1.  
a: proportion of individuals in the total sample of insured with a confirmed diagnosis of CHD during the year 2016  
b: per 10,000 population  
β: regression coefficient, GISD: German Index of Social Deprivation, MI: myocardial infarction, ρ: spatial autocorrelation parameter, SE: standard error
